# Supplementary material for: Sleep continuity: a new metric to quantify disrupted hypnograms in non-sedated intensive care unit patients
Source: Springer Nature journal article supplement (doi:10.1186/s13054-014-0628-4), 2014-11-21
Supplement: MOESM1 [file 9779866]

Patients with acute hypercapnic respiratory failure (n=64)

Eligible patients (n=35)

Not enrolled patients (n=10):

- Technical problems (n= 5)
- Declined to participate (n=5)

Enrolled patients (n=25)

Technical problems (n=1)

Recorded patients  
(n=24)
