# Supplementary material for: Sleep continuity: a new metric to quantify disrupted hypnograms in non-sedated intensive care unit patients
Source: Springer Nature journal article supplement (doi:10.1186/s13054-014-0628-4), 2014-11-21

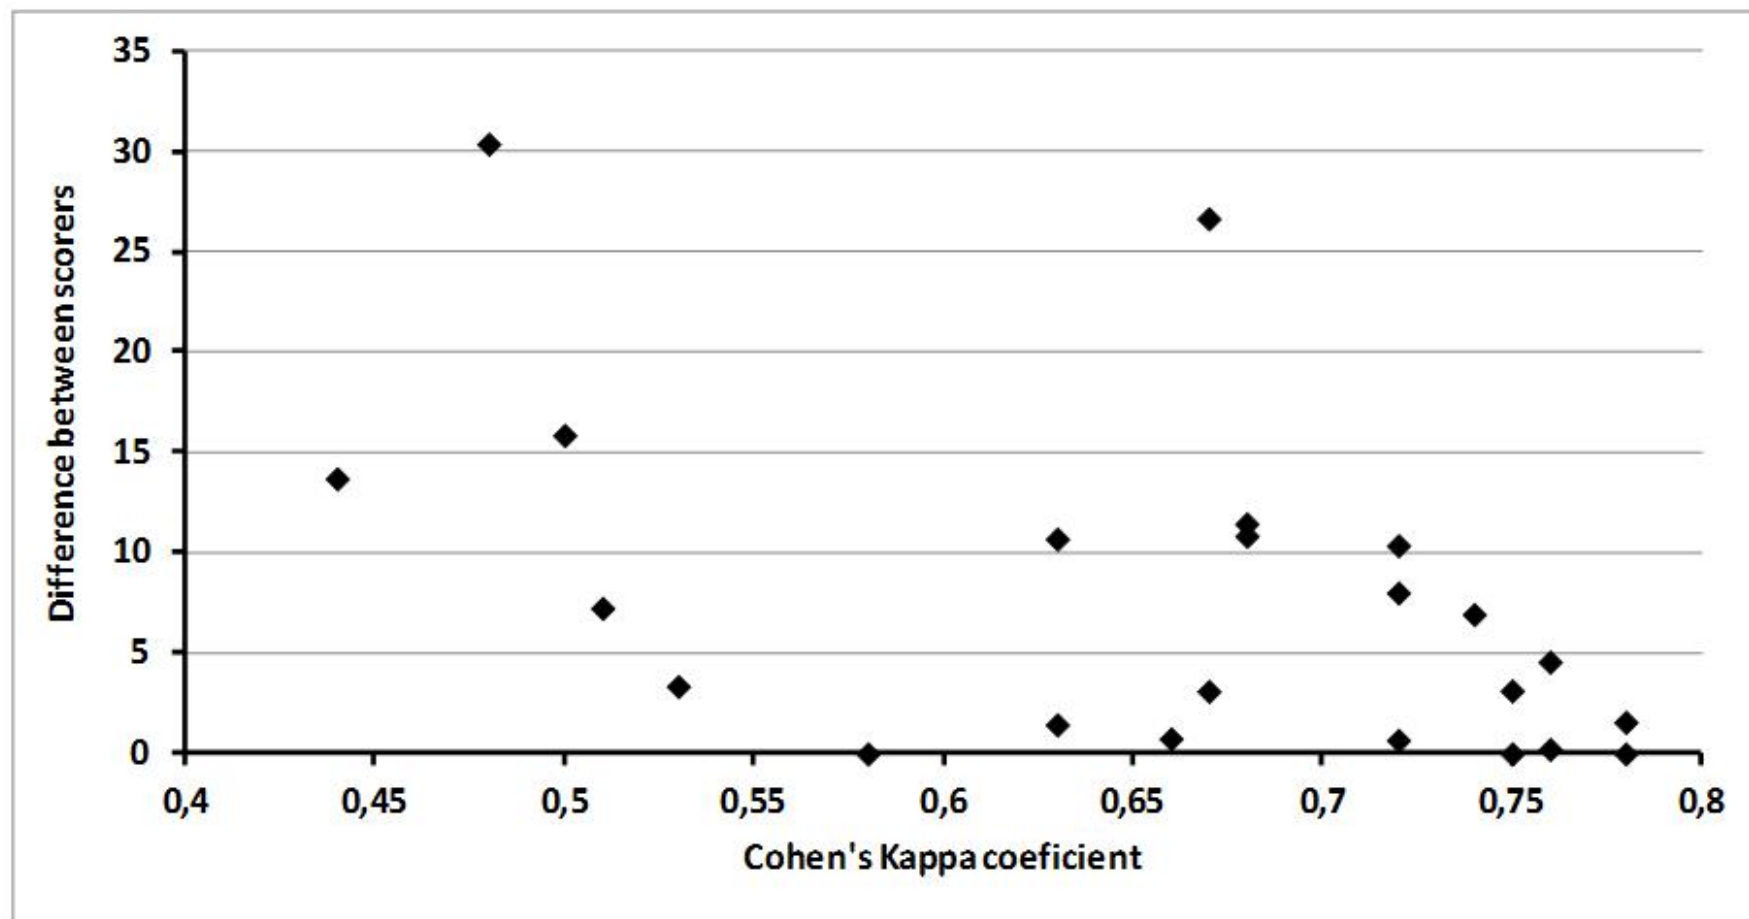

Supplement: MOESM2 [file 9779866]
